# Supplementary figures and images for: Enhancing spatial detection accuracy for syndromic surveillance with street level incidence data
Source: Springer Nature journal article supplement (doi:10.1186/1476-072x-9-1), 2010-01-18

## Detected Cluster Radii

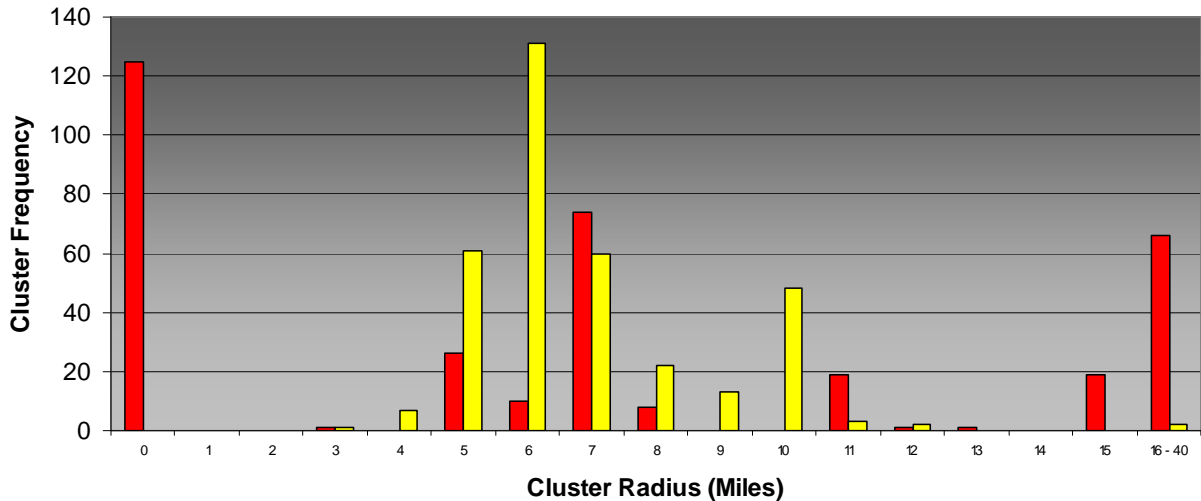

■ ESSENCE-Zip ■ Bernoulli-Street

Supplement: 12942_2009_334_MOESM7_ESM.pdf [file 12942_2009_334_MOESM7_ESM.pdf]
